# Supplementary material for: IL-1β produced by aggressive breast cancer cells is one of the factors that dictate their interactions with mesenchymal stem cells through chemokine production
Source: PubMed Central journal article supplement (PMC4745709; doi:10.18632/oncotarget.4732), 2015-08-04
Supplement: oncotarget-06-29034-s001.pdf [file oncotarget-06-29034-s001.pdf]

## SUPPLEMENTARY FIGURES AND TABLE

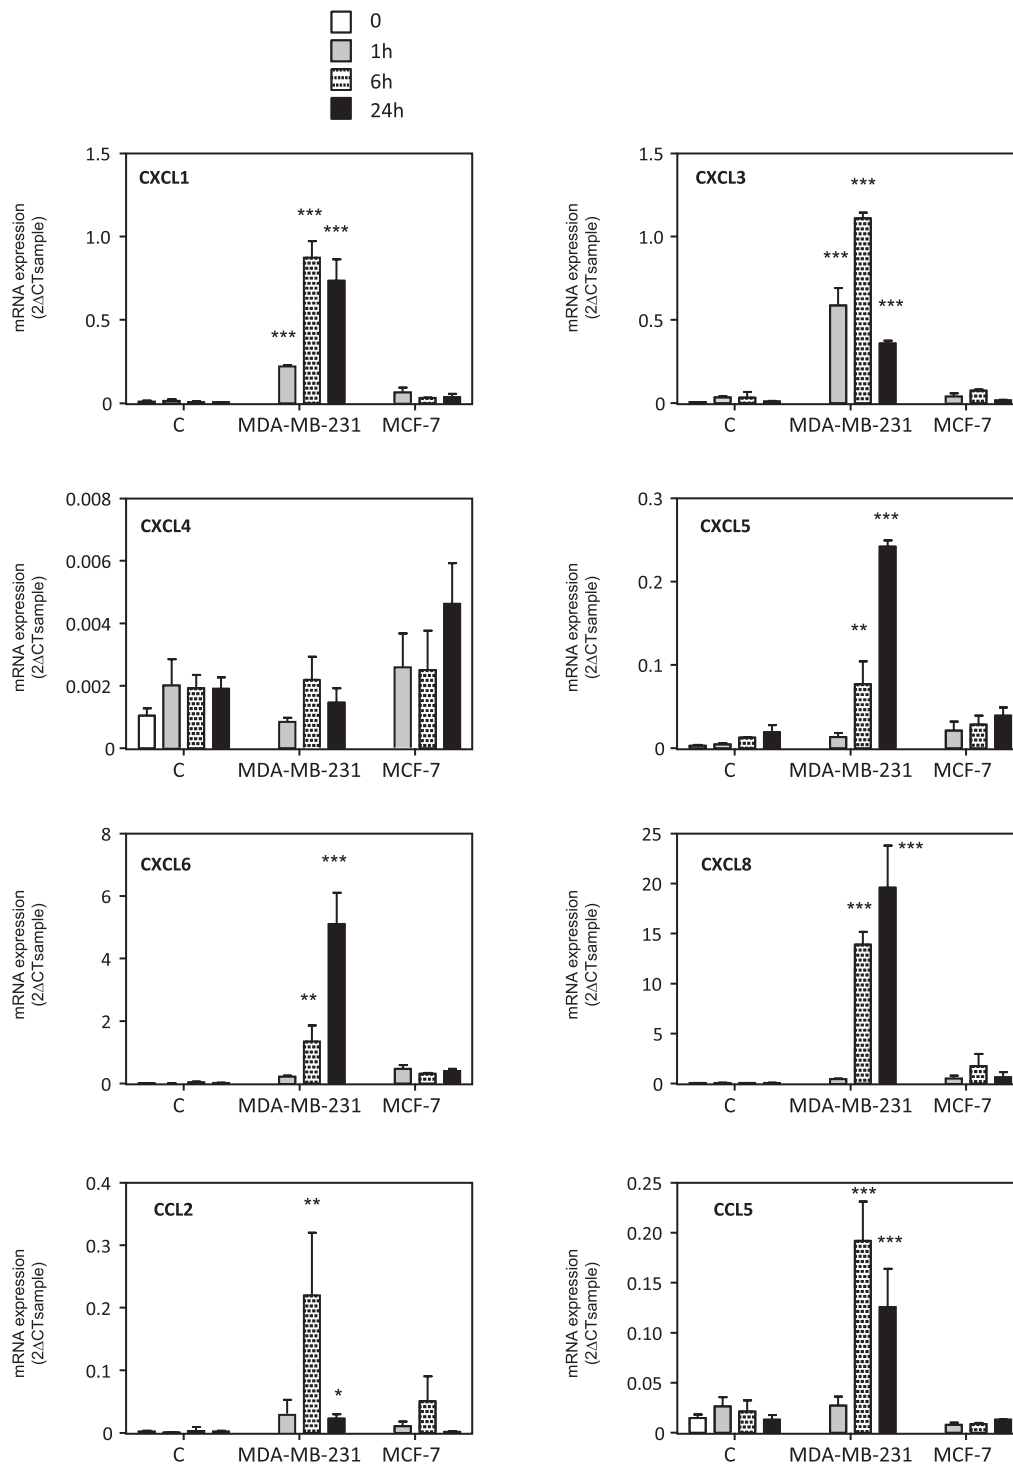

**Supplementary Figure S1: Kinetics of chemokine expression of MSCs treated with cancer cell conditioned media.** MSCs were treated for 0, 1, 6 or 24 h with conditioned medium from MDA-MB-231 or MCF-7 cancer cells. RNA expression was quantified by real-time PCR. Results represent the mean  $\pm$  SEM of 3 independent experiments. Measurements of chemokine expression levels by MSCs treated with MDA-MB-231 and MCF-7 CM were compared to the ones of control medium for the same time point by unpaired Student's *t* test. \* $p < 0.05$ , \*\* $p < 0.01$ , \*\*\* $p < 0.001$ .

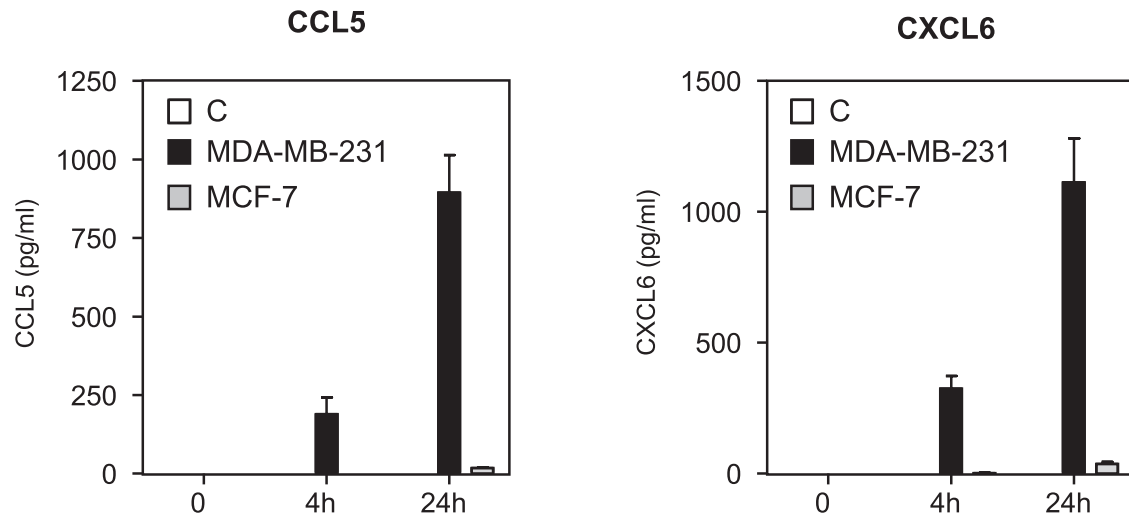

**Supplementary Figure S2: MDA-MB-231 cells increase the secretion of chemokines by MSCs.** MSCs were treated for 24 h with control medium (C), conditioned medium from either MDA-MB or MCF-7 cancer cells. MSCs were then incubated in fresh medium that was collected after 4 or 24 h for ELISA assay. The levels of CCL5 and CXCL6 chemokines were measured by ELISA and are expressed in pg/ml. The graphs represent the mean  $\pm$  SEM of 3 independent experiments.

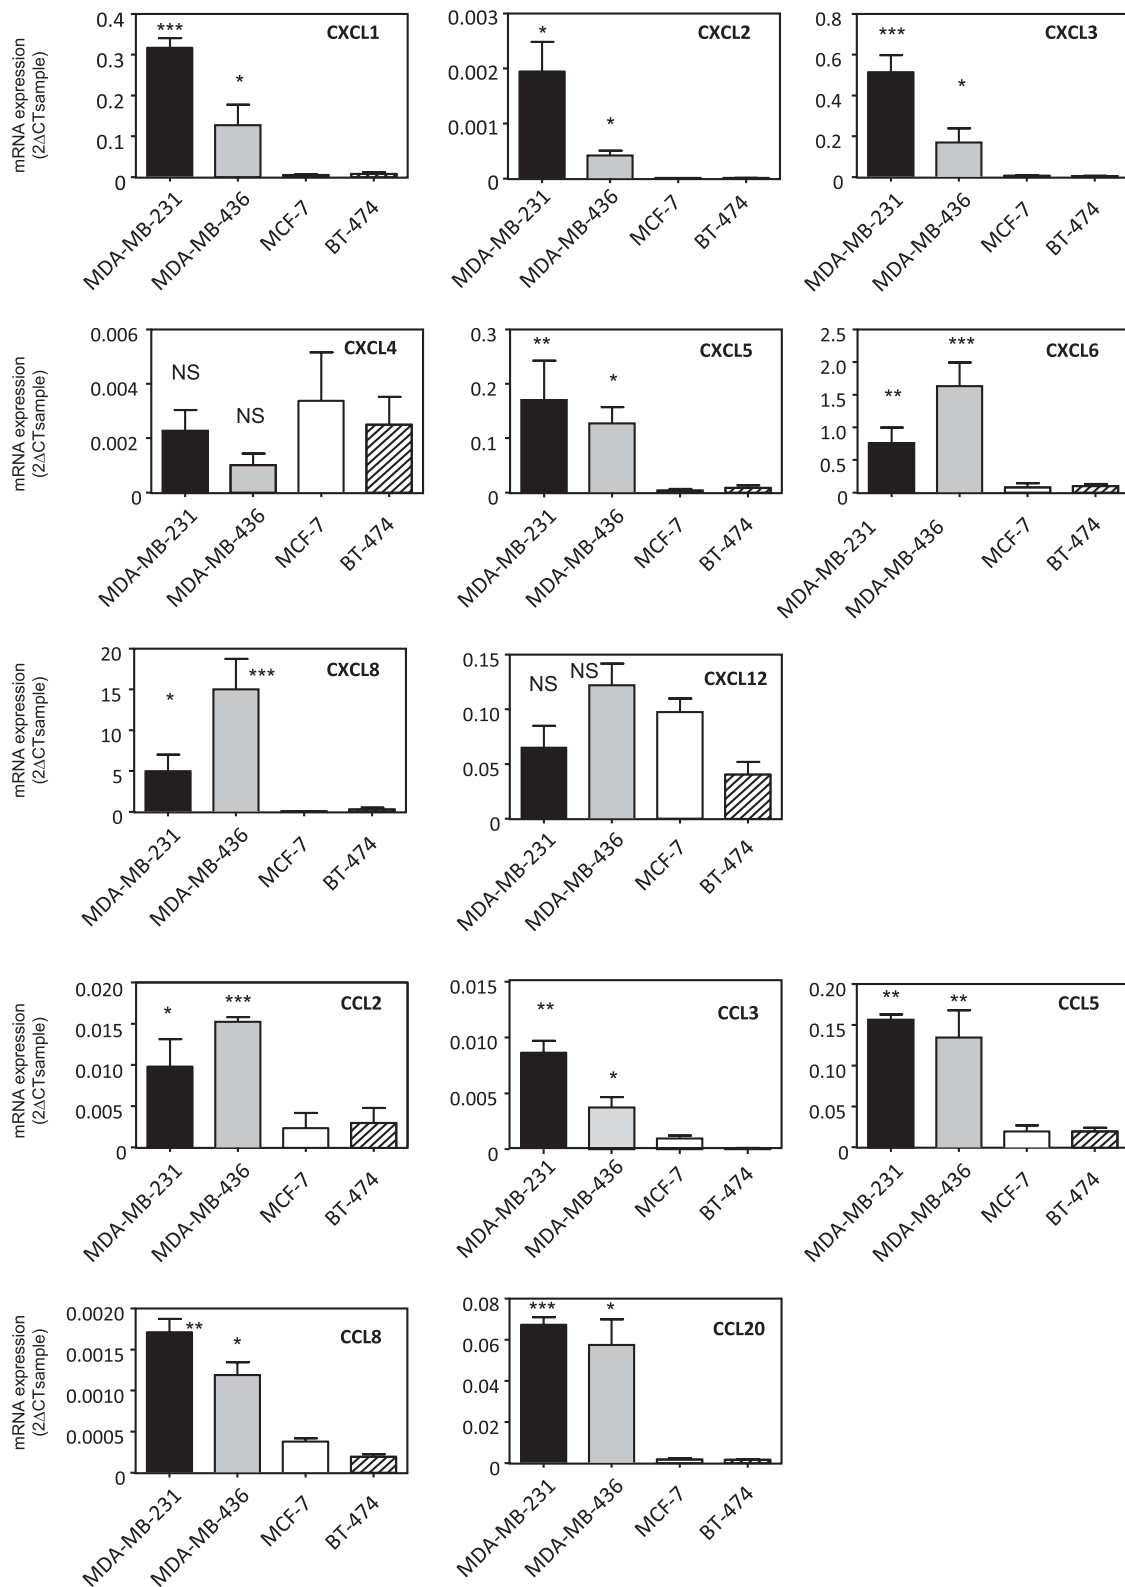

**Supplementary Figure S3: Metastatic cell lines increase the production of chemokine secreted by MSCs.** MSCs were treated for 24 h with conditioned medium from metastatic (MDA-MB-231, MDA-MB-436) or non-metastatic (MCF-7, BT-474) cancer cells. RNA expression was quantified by real-time PCR. Results represent the mean  $\pm$  SD of 3 independent experiments. Measurements of chemokine levels of MSCs treated with MDA-MB-231 CM and MDA-MB-436 CM were compared to the one of MCF-7 and BT-474 by unpaired Student's *t* test. NS: non significant, \* $p < 0.05$ , \*\* $p < 0.01$ , \*\*\* $p < 0.001$ .

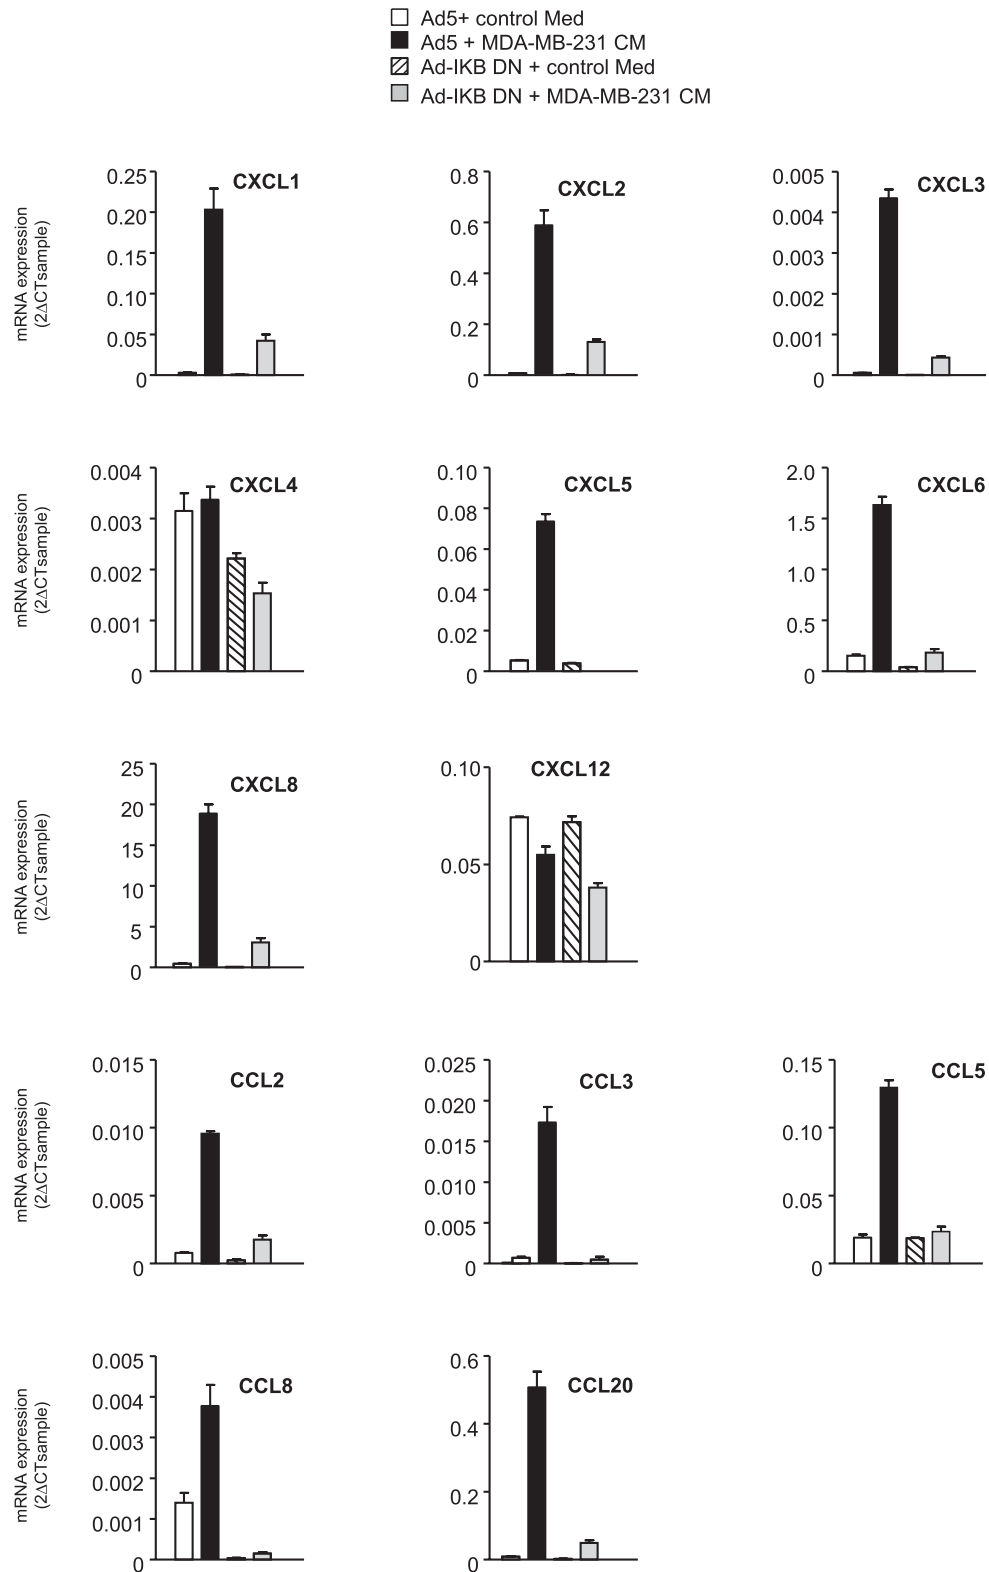

**Supplementary Figure S4: A dominant negative form of IκB inhibits the induction of chemokines in MSC by the conditioned medium of MDA-MB-231 cells.** MSCs cells were infected overnight with Ad5 (empty back bone) or Ad- IκB DN adenoviruses. The next day, the medium was changed and the Ad5 and Ad- IκB DN infected cells were treated either with control non conditioned medium (control Med) or conditioned medium from MDA-MB-231 cells (MDA-MB-231 CM). After 6 h, RNA was extracted from MSCs. The levels of chemokine RNA in MSCs were measured by Real-time PCR. Results represent the mean ± SEM of 3 independent experiments.

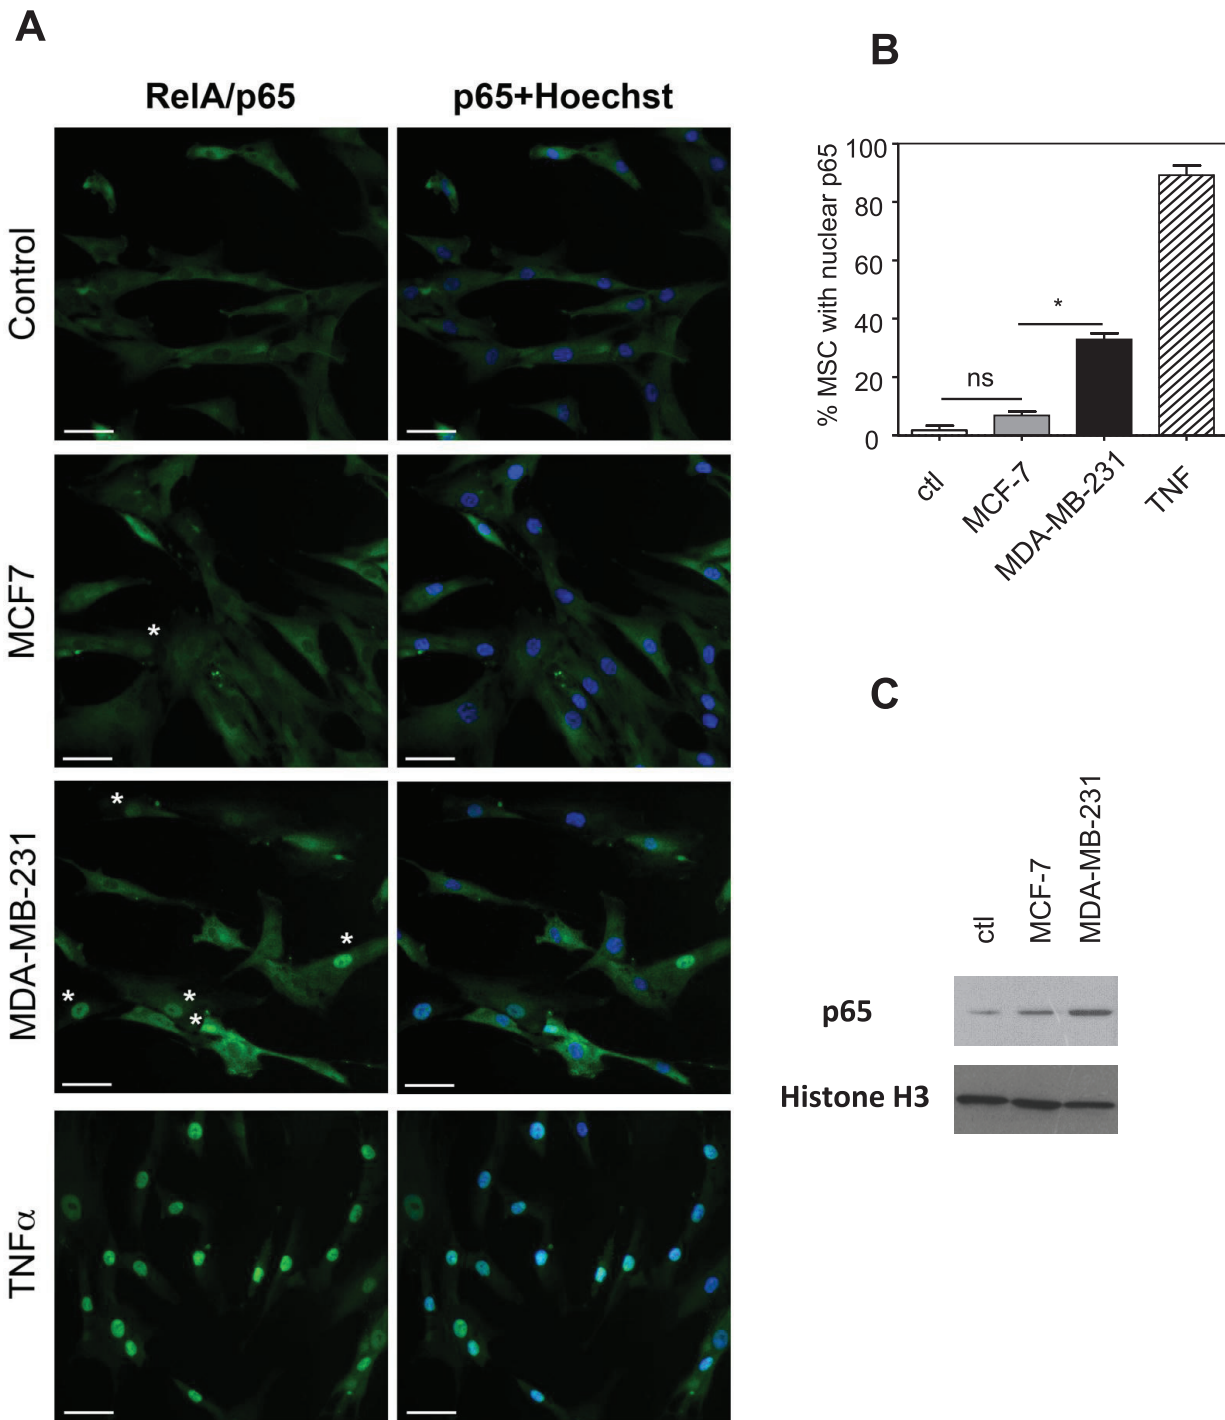

**Supplementary Figure S5: MDA-MB-231 conditioned medium activates NF- $\kappa$ B signaling in MSCs.** **A.** MSCs were incubated for 30 min with control non conditioned medium, medium conditioned by MDA-MB-231 or MCF-7 cells or with 1 ng/ml of TNF $\alpha$ , fixed and immuno-stained for p65/RelA (left panels), with nuclei stained with Hoechst (right panels). Cells showing p65 nuclear staining, after incubation with the MCF7 and MDA-MB-231 conditioned media, are indicated with asterisks. Scale bars, 50  $\mu$ m. **B.** The histogram shows the % of MSCs with nuclear p65 staining in the different culture conditions. The mean values  $\pm$  SEM of data obtained in 5 independent experiments with MSCs from 3 different donors are shown, with a total of 400 counted cells for each condition. The tested incubation times were of both 30 min and 2 hours (same results for the two times). Data on the different treatments were compared as non normal distributions using the Mann-Whitney rank sum test. (\*,  $P < 0.05$ ; ns, not significant). **C.** MSCs were incubated for 30 min with control non conditioned medium (Ctl) or medium conditioned by MDA-MB-231 or MCF-7 cells and nuclear extracts prepared. Nuclear p65 content was determined by western blot analysis. Histone H3 was used as a loading control.

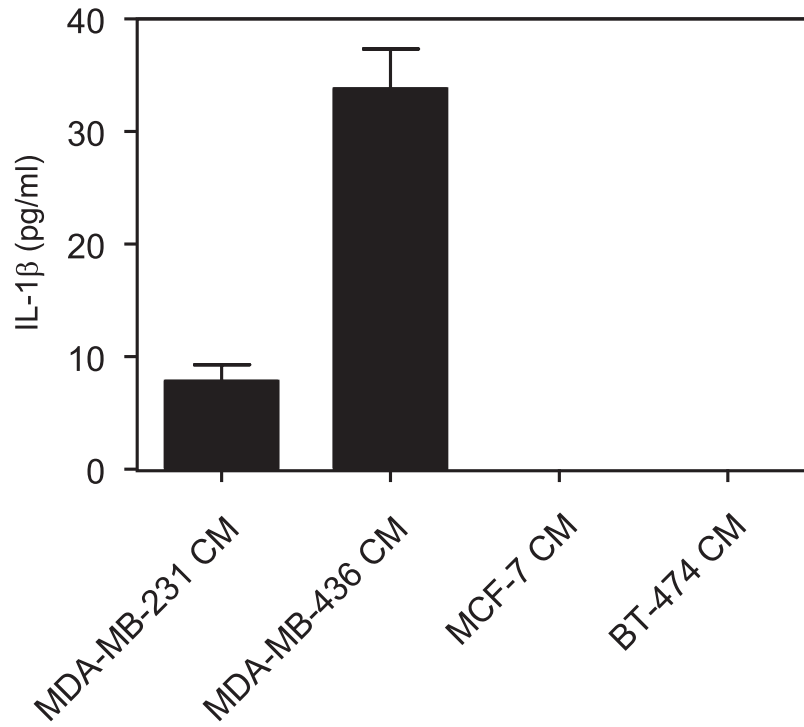

**Supplementary Figure S6: Metastatic cell lines produce higher levels of IL-1β.** IL-1β secretion of MDA-MB-231, MDA-MB-436, MCF-7 and BT-474 cells was measured by ELISA. Results represent the mean ± SEM of 3 experiments.

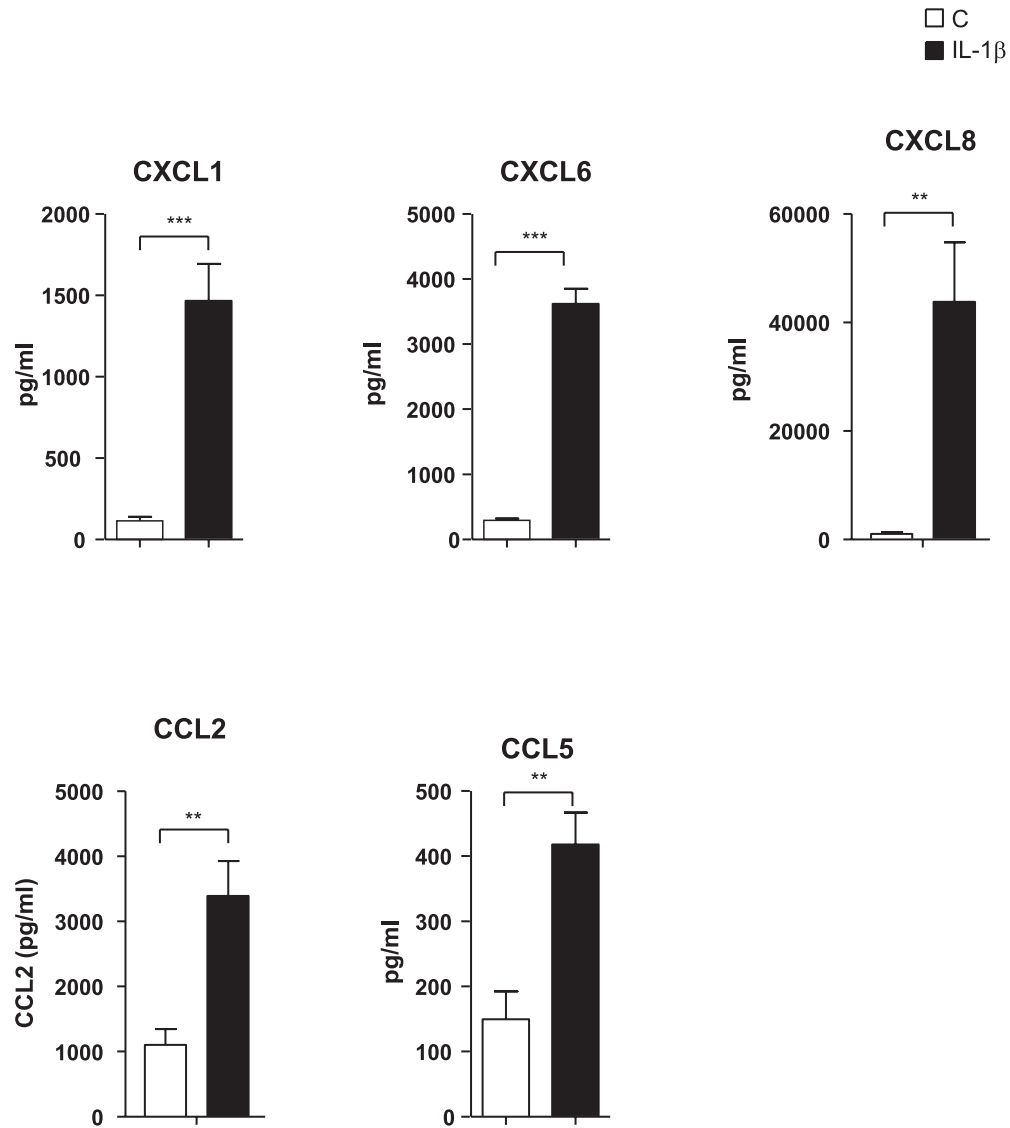

**Supplementary Figure S7: CXCL8 and CCL2 secretion by MSCs upon IL-1β stimulation.** MSCs cells were treated or not with 1 ng/ml of recombinant IL-1β for 24 h. The medium was collected after 24 h and the concentration of CXCL1, CXCL6, CXCL8, CCL2, CCL5 was measured by ELISA. Results represent the mean ± SEM of 3 independent experiments. Measurements of chemokine levels treated or not by IL-1 β were analyzed by unpaired Student's *t* test. \**p* < 0.05, \*\**p* < 0.01, \*\*\**p* < 0.001.

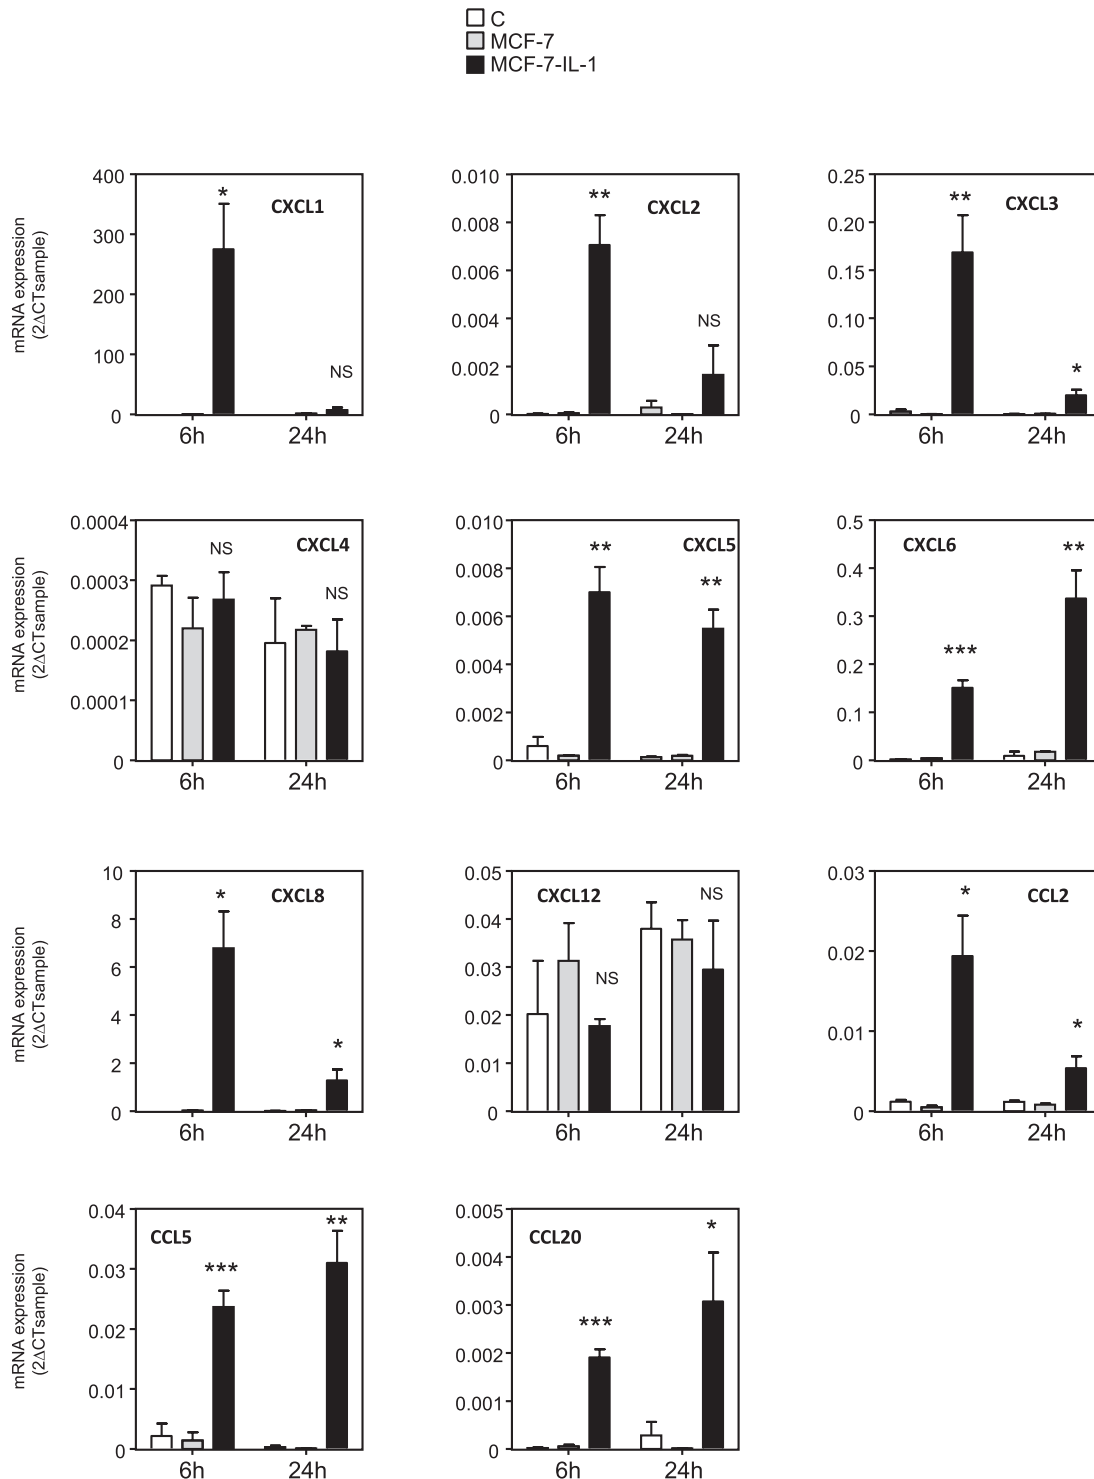

**Supplementary Figure S8: MCF-7 cells transfected with IL-1 $\beta$  enable a strong induction of chemokine expression in MSCs.** MCF-7 were transfected with control vector (MCF-7) or hIL1 $\beta$  expressing vector (MCF-7-IL1). 48 h after transfection, the conditioned medium was harvested. MCF-7-IL1 produced IL-1 $\beta$  at a concentration of 400 pg/ml, compared to MCF-7 cells which expressed less than 5pg/ml of IL-1 $\beta$ (data not shown). MSC were treated for 6 h or 24 h with control non conditioned medium (C), untreated MCF-7 cells (MCF-7) or MCF-7 cells transfected with IL-1 $\beta$  (MCF-7-IL1) conditioned media. RNA expression was quantified by real-time PCR. Results represent the mean of 3 independent experiments. Measurements of chemokine levels of MSCs treated with MCF-7 CM was compared to the one of MCF-7 -IL1 by unpaired Student's *t* test. NS: non significant, \**p* < 0.05, \*\**p* < 0.01, \*\*\**p* < 0.001.



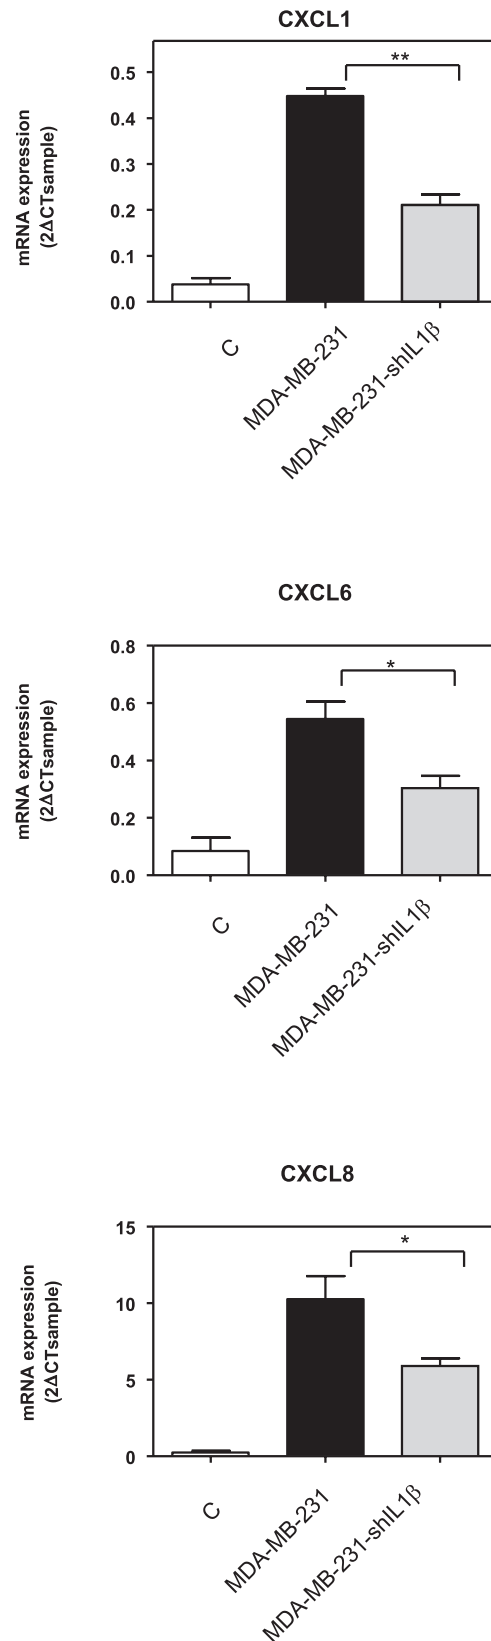

**Supplementary Figure S9: Inhibition of IL-1 $\beta$  production by MDA-MB-231 cells reduces the production of chemokines RNA by MSCs in the presence of MDA-MB-231 conditioned medium.** MSC cells were treated for 24 h with control non conditioned medium (C), conditioned medium from MDA-MB-231 transfected with empty PLKO-1 vector (MDA-MB-231) or MDA-MB-231-shIL1 $\beta$  cancer cells. After 24 h of treatment, RNA were extracted from MSCs. The levels of CXCL1, CXCL6 and CXCL8 RNA in MSCs were measured by Real-time PCR. Results represent the mean  $\pm$  SEM of 3 independent experiments.

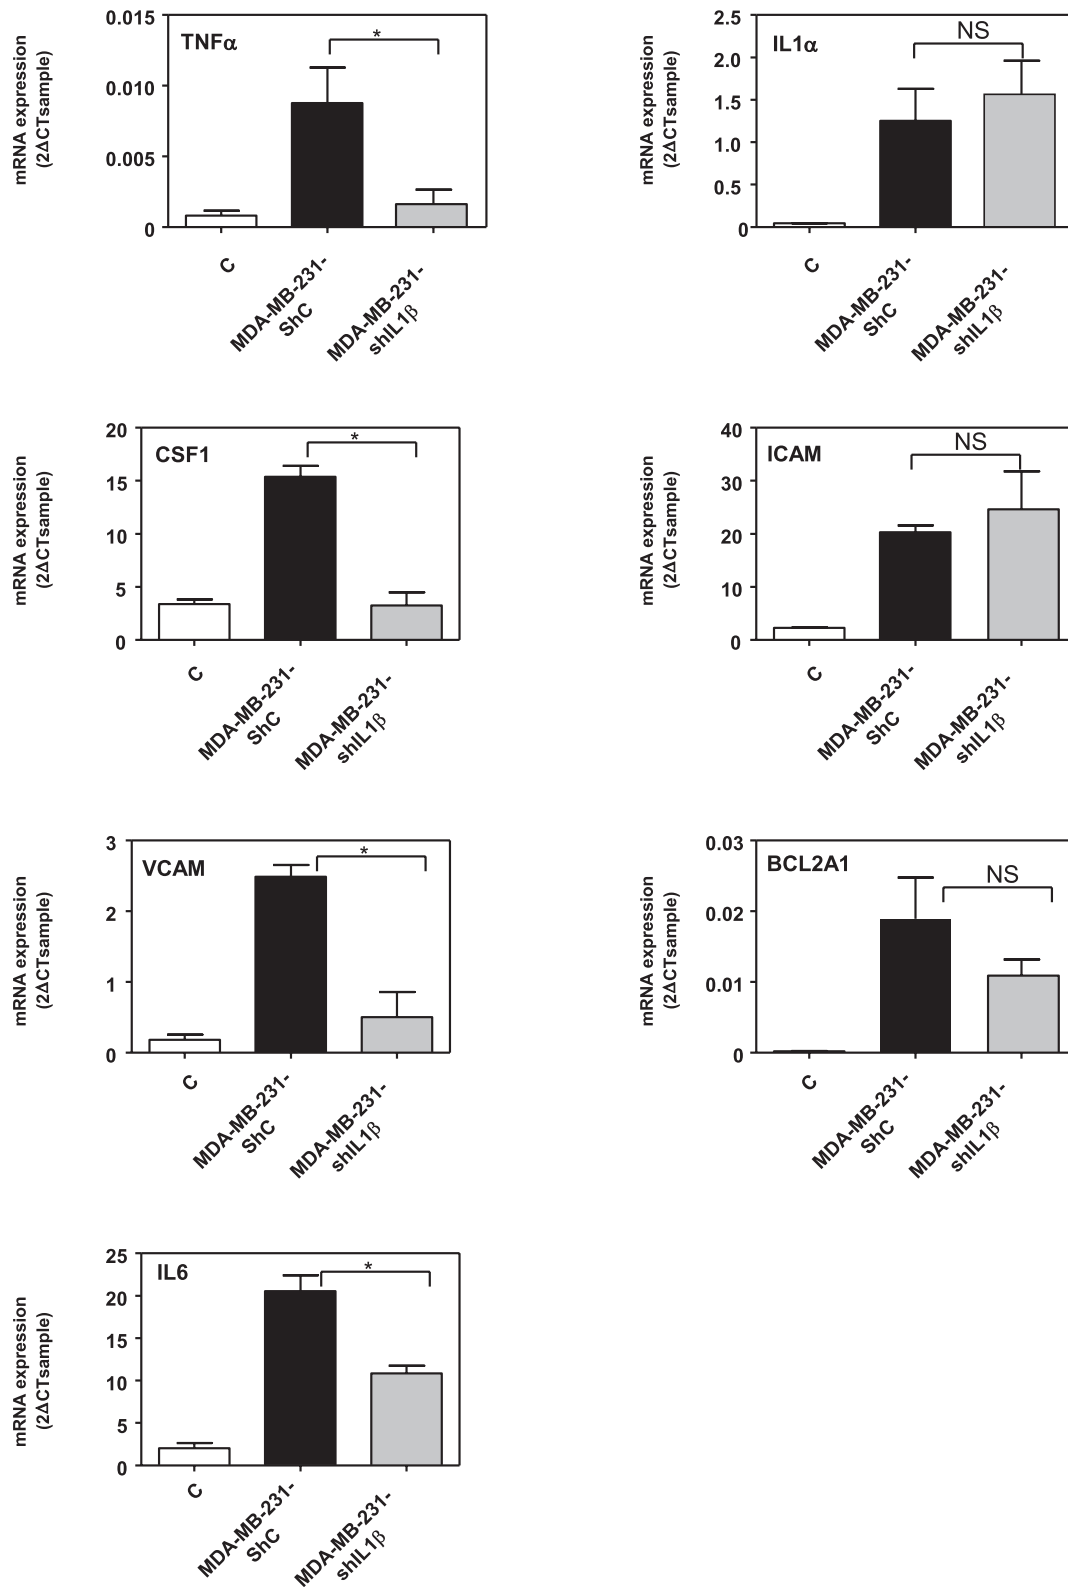

**Supplementary Figure S10: NF- $\kappa$ B pathway in MSCs is down-regulated by IL-1 $\beta$  silencing.** MSCs were treated for 6 h with control non conditioned medium (C), conditioned medium from MDA-MB-231-sh scramble (MDA-MB-231-shC) or MDA-MB-231-shIL1 $\beta$  cells. RNA expression was quantified by real-time PCR. The graphs correspond to the mean of 3 experiments. The levels of gene expression in MSCs treated with MDA-MB-231-shC was compared to the one of MDA-MB-231-shIL1 $\beta$  medium by unpaired Student's *t* test. NS: non significant, \**p* < 0.05.

**Supplementary Table S1: Sequences of the primers used in real time PCR**

|        | Forward                    | Reverse                    |
|--------|----------------------------|----------------------------|
| RS9    | AAGGCCGCCCGGAACTGCTGAC     | ACCACCTGCTTGCGGACCCTGATA   |
| CXCL1  | AACCCCAAGTTAGTTCAATCTGGA   | CATGTTGCAGGCTCCTCAGAA      |
| CXCL2  | TCAAACCCAAGTTAGTTCAATCCTGA | GCTGACATGTGATATGTCATCACGAA |
| CXCL3  | GGAGCACCAACTGACAGGAGAGAA   | ACCACCCTGCAGGAAGTGTCAA     |
| CXCL4  | AGCCGGGTTCTGCGCCTCA        | TTCAGCTTCAGCGCTGGCGAA      |
| CXCL5  | CATCGCCAGCGCTGGTCCT        | GGGATGAACTCCTTGCGTGGTCT    |
| CXCL6  | GTTTACGCGTTACGCTGAGAGTAAA  | CGTTCTTCAGGGAGGCTACCA      |
| CXCL8  | CACCGGAAGGAACCATCTCACT     | TCAGCCCTCTTCAAAACTTCTCC    |
| CXCL12 | TGAGCAGTGAATGATTCAGTGTT    | CTTCTCCTGGACCATTTTCACAT    |
| CCL2   | TCGCGAGCTATAGAAGAATCACCA   | TTCCCAAGTCTCTGTATCTAAAA    |
| CCL3   | CAGAATCATGCAGGTCTCCACTG    | GCGTGTGCAGCAGCAAGTGATG     |
| CCL5   | CCCCGTGCCACATCAAGGAGTAT    | TTCAAGGAGCGGGTGGGGTAGGAT   |
| CCL8   | GGACTTGCTCAGCCAGATTCAGTT   | GCTCTCCAGCCTCTGGATAGGAAT   |
| CCL20  | ATCCTAAATTTATTGTGGGCTTCA   | TTCTTTCTGTTCTTGGGCTATGTC   |
